# Supplementary material for: Improving the accuracy of 31P NMR chemical shift calculations by use of scaling methods
Source: Beilstein J Org Chem. 2023 Jan 10;19:36–56. doi: 10.3762/bjoc.19.4 (PMC9843238; doi:10.3762/bjoc.19.4)
Supplement: File 2 — Tables S1–S17 in editable format. [file Beilstein_J_Org_Chem-19-36-s002.xlsx]

## Sheet: Sheet1
Table S1. Absolute chemical shifts (1) for tri and tetracoordinate phosphorus compounds
Functional for Optimization		B3LYP	B3LYP	M06-2X	M06-2X	B3LYP	B3LYP	B3LYP	PBE0	PBE0 (3)
Functional for NMR		B3LYP	B3LYP	B3LYP	M06-2X	B3LYP	B3LYP	PBE0	PBE0	PBE0 (3)
Compound/Basis set (2)	Exp vs H3PO4	6-311G(d,p)	6-311+G(2d,p)	6-311+G(2d,p)	6-311+G(2d,p)	IGLO-III	pcS-2	6-311+G(2d,p)	6-311+G(2d,p)	6-311G(2d,2p)
PH3	-238	561.403	554.995	559.187	578.476	563.924	551.94	576.831	578.56	583.218
PMeH2	-163.5	469.864	459.271	463.605	487.801	467.099	455.291	487.237	488.047	491.848
PMe2H	-98.5	397.54	383.685	389.251	414.724	391.547	379.175	415.467	418.193	421.884
PMe3	-61.58	354.533	340.075	349.353	372.099	348.983	335.628	372.479	379.488	383.015
PPh3	-5.28	294.157	281.693	291.094	305.77	289.32	275.357	311.833	318.391	319.759
Methoxyphospholane	133.3	118.2	111.217	126.401	135.678	124.097	110.603	131.245	138.485	137.136
P(OMe)3 isomer A		124.084	119.417	131.037	139.47	131.23	117.975	139.824	146.161	143.352
P(OMe)3 isomer B		159.313	150.155	163.665	170.613	161.996	148.981	169.755	178.019	175.056
P(OMe)3 isomer C		93.7333	92.5935	104.513	112.638	104.615	90.3623	113.33	119.931	116.164
P(OMe)3 weighted avg (4)	141.41	125.168	120.333	135.26	143.47	132.167	118.852	140.684	147.296	145.761
PCl3 (exp struc ) (5)	219.79	26.2463	25.2261	25.2261	42.144	33.0505	22.1519	62.6203	62.6203	62.0324
PCl3(DFT struc) (6)	219.79	-32.6576	-31.447	0.4022	19.2026	-22.443	-34.6513	9.8567	35.7787	37.7006
H3PO4 in water sym isomer	0	290.103	282.001	287.912	293.713	292.352	281.481	295.579	298.514	298.83
PH4+ BF4- in MeOH	-105.3	435.2	417.534	419.285	431.22	422.199	413.735	436.878	437.632	460.168
P(OPh)4+ PF6-	-28	320.394	310.94	308.735	312.317	322.725	312.731	323.827	326.689	327.793
O=P(OCH2)3P=O PO	-18.1	316.988	306.697	310.161	315.47	316.885	305.575	320.291	321.912	327.7
P(OMe)4+ BF4- isomer A		293.763	285.89	289.517	293.671	295.928	285.674	298.549	301.191	302.566
P(OMe)4+ BF4- isomer B		286.517	278.157	280.71	285.732	288.747	277.918	291.08	293.464	301.804
P(OMe)4+ BF4- weighted avg	1.9	293.519	285.63	289.512	293.666	295.686	285.413	298.298	301.176	302.463
(iPrO)2P(O)H isomer A		292.786	283.652	286.502	289.151	293.138	281.538	296.534	297.783	302.575
(iPrO)2P(O)H isomer B		292.693	283.443	286.185	289.633	292.363	280.615	296.193	298.935	301.679
(iPrO)2P(O)H isomer C		292.716	283.484	286.255	289.731	292.411	280.67	296.227	298.95
(iPrO)2P(O)H isomer D		292.082	282.96	286.415	289.071	292.488	280.864	295.869	297.729
(iPrO)2P(O)H weighted avg	4.54	292.698	283.473	286.238	289.651	292.455	280.726	296.231	298.839	301.704
O=P(OCH2)3P=O PC	6.4	306.342	289.931	288.942	294.668	293.865	284.689	310.126	310.159	312.736
(MeO)2P(O)H isomer A		288.379	278.524	282.778	286.579	287.456	275.618	291.273	294.287	297.829
(MeO)2P(O)H isomer B		288.277	278.248	281.76	285.247	287.394	275.637	291.108	293.145	299.017
(MeO)2P(O)H isomer C		286.177	276.423	280.716	284.363	285.477	273.62	289.177	291.827	295.918
(MeO)2P(O)H weighted avg	11.3	288.004	278.136	282.408	286.163	287.124	275.297	290.905	293.369	297.48
PPh4+ Cl-		275.805	262.341	268.671	275.531	266.093	253.502	286.913	290.79
PPh4+ Br-	23.17	278.765	265.115	271.523	278.011			289.481	293.409	294.909
PMe4+ Cl-		282.139	260.589	264.185	277.335	262.635	253.738	286.564	290.224
PMe4+ Br-	25.1	282.199	260.619	265.259	278.587			286.595	290.139	291.349
(iPrO)2P(O)Me isomer A		268.106	258.405	262.695	265.038	267.182	256.608	273.282	276.151	283.826
(iPrO)2P(O)Me isomer B		262.793	253.697	257.894	260.937	262.872	251.559	268.593	271.712	276.233
(iPrO)2P(O)Me isomer C		268.393	258.71	262.73	265.074	267.459	256.895	273.596	276.283	283.701
(iPrO)2P(O)Me weighted avg	28.61	262.887	253.782	258.15	261.156	262.949	251.649	268.677	271.918	276.269
Ph3PO	29.1	275.358	261.774	266.136	269.991	266.768	254.899	281.344	284.15	291.491
(MeO)2P(O)Me isomer A		259.357	249.299	254.183	257.633	258.175	246.95	264.24	267.617	272.718
(MeO)2P(O)Me isomer B		258.602	248.09	253.771	257.024	256.873	245.578	262.921	266.752	272.694
(MeO)2P(O)Me isomer C		266.017	255.174	260.074	262.786	263.804	252.774	269.986	273.229	279.252
(MeO)2P(O)Me weighted avg	32.3	259.441	249.358	254.588	257.972	258.226	247.003	264.294	267.732	272.75
Me3PO	38.79	272.458	254.708	259.25	264.138	259.221	249.672	275.31	278.989	292.008
EtOP(O)Me2 isomer A		248.235	234.284	239.866	242.427	241.213	230.587	251.628	255.446	265.407
EtOP(O)Me2 isomer B		252.887	237.872	242.418	244.304	244.981	234.147	255.257	258.325	273.089
EtOP(O)Me2 weighted avg	50.3	248.29	234.326	239.891	242.445	241.257	230.628	251.67	255.477	265.414
H2P-P(H)-PH2 isomer A PH2										436.4497, 436.4497
H2P-P(H)-PH2 isomer A PH										481.45
H2P-P(H)-PH2 isomer B PH2										508.7065, 508.7064
H2P-P(H)-PH2 isomer B PH										464.964
H2P-P(H)-PH2 isomer C PH2										508.4149, 522.5669
H2P-P(H)-PH2 isomer C PH										483.906
H2PP(H)PH2 weighted avg PH2	-162.6									457.677
H2PP(H)PH2 weighted avg PH	-179.1									478.593
H2P-PH2 isomer A										527.787
H2P-PH2 isomer B										537.765
H2P-PH2 weighted avg	-205									532.279
(1) Except as noted, all optimized with B3LYP/6-31+G(d,p), CHCl3 IEF-PCM solvation
(2) For NMR calculation, GIAO
(3) Latypov optimization (see text): optimized with 6-31+G(d) basis set, no solvation, and NMR with no solvation (both including H3PO4, which did not use water solvation).
(4) See Table S2 for weighted average isomer ratio calculations
(5) Experimental structure used for NMR calculation (see text)
(6) DFT optimized structure used for NMR calculation
Table S2. Calculation of energy-weighted isomer ratios for Table S1 compounds										E (au) (1)
	E (au) (1)	Relative E		E (au) (1)	Relative E		E (au) (1)	Relative E		no solvent	Relative E
Functional for Optimization	B3LYP	(kcal)	Ratio 298.15 K	M06-2X	(kcal)	Ratio 298.15 K	PBE0	(kcal)	Ratio 298.15 K	PBE0	(kcal)	Ratio 298.15 K
Basis set	6-31+G(d,p)			6-31+G(d,p)			6-31+G(d,p)			6-31+G(d)
P(OMe)3 Isomer
A	-686.722	0	0.808347	-686.525	0	0.833628	-686.181	0	0.813234	-686.164	0	0.878935
B	-686.72	1.20796	0.105235	-686.523	1.03225	0.14599	-686.179	1.21925	0.103872	-686.162	1.3071	0.0967925
C	-686.72	1.32467	0.086418	-686.521	2.19879	0.0203818	-686.179	1.35291	0.082894	-686.161	2.12663	0.024273
P(OMe)4+ BF4- isomer
A	-1226.32	0	0.966346	-1225.94	0	0.999368	-1225.24	0	0.998032	-1225.19	0	0.864035
B	-1226.32	1.98921	0.0336537	-1225.93	4.36433	0.000631893	-1225.23	3.69038	0.0019682	-1225.19	1.09563	0.135965
(iPrO)2P(O)H isomer
A	-804.64	1.40186	0.0685665	-804.375	1.61646	0.0333974	-803.956	1.38115	0.0657087	-803.926	2.10906	0.0276607
B	-804.641	0.860943	0.170846	-804.378	0.106677	0.42697	-803.957	0.631275	0.232962	-803.929	0	0.972339
C	-804.642	0	0.730604	-804.378	0	0.511201	-803.958	0	0.676105
D	-804.639	1.89194	0.0299831	-804.375	1.71185	0.0284314	-803.955	1.94842	0.0252239
(MeO)2P(O)H isomer
A	-647.456	0	0.664917	-647.279	0	0.78136	-646.968	0	0.562454	-646.951	0	0.778427
B	-647.454	0.797565	0.17304	-647.277	1.37111	0.077236	-646.966	0.914909	0.120075	-646.947	2.05949	0.0240769
C	-647.454	0.83647	0.162043	-647.277	1.0128	0.141404	-646.967	0.338855	0.317471	-646.949	0.812625	0.197496
(iPrO)2P(O)Me isomer
A	-843.947	2.88529	0.00754215	-843.664	2.03564	0.0304889	-843.215	2.4749	0.0146434	-843.181	3.73305	0.00182622
B	-843.951	0	0.982723	-843.667	0	0.946846	-843.219	0	0.954459	-843.187	0	0.995189
C	-843.947	2.73406	0.00973526	-843.663	2.21134	0.0226647	-843.215	2.0325	0.0308972	-843.182	3.44189	0.00298523
(MeO)2P(O)Me isomer
A	-686.766	0	0.954935	-686.567	0	0.866147	-686.23	0	0.93534	-686.209	0	0.510909
B	-686.762	2.06827	0.0291016	-686.564	1.57379	0.0608121	-686.227	1.8932	0.038304	-686.209	0.0338855	0.482509
C	-686.762	2.42407	0.015963	-686.564	1.46523	0.0730407	-686.226	2.11471	0.0263557	-686.205	2.57844	0.00658162
EtOP(O)Me2 isomer
A	-650.83	0	0.988291	-650.633	0	0.990129	-650.322	0	0.98922	-650.297	0	0.999064
B	-650.826	2.62801	0.0117094	-650.628	2.73029	0.00987116	-650.318	2.67758	0.0107797	-650.291	4.13152	0.00093575
H2P-P(H)-PH2 isomer											at 213.15 K	Ratio 213.15 K
A										-1026.58	0	0.715324
B										-1026.58	0.566641	0.187723
C										-1026.58	0.84651	0.0969533
H2P-PH2 isomer
A										-684.774	0	0.549834
B										-684.774	0.0847138	0.450166
(1) Sum of electronic and thermal Free Energies from Gaussian vibrational calculation; see Table S1 notes for solvation.
Gas constant from IUPAC:		1.9872	cal mol-1 J-1
E conversion:		627.51	kcal/mol/au
Table S3. Calculated (unscaled) chemical shifts (1) for tri and tetracoordinate phosphorus compounds referenced to H3PO4 at 0.00 ppm
Functional for Optimization		B3LYP	B3LYP	M06-2X	M06-2X	B3LYP	B3LYP	B3LYP	PBE0	Latypov PBE0
Functional for NMR (2)		B3LYP	B3LYP	B3LYP	M06-2X	B3LYP	B3LYP	PBE0	PBE0	Latypov PBE0
Compound/NMR basis set	Exp vs H3PO4	6-311G(d,p)	6-311+G(2d,p)	6-311+G(2d,p)	6-311+G(2d,p)	IGLO-III	pcS-2	6-311+G(2d,p)	6-311+G(2d,p)	6-311G(2d,2p)
PH3	-238	-271.299	-272.994	-271.276	-284.763	-271.572	-270.459	-281.252	-280.046	-284.388
PMeH2	-163.5	-179.761	-177.271	-175.693	-194.088	-174.747	-173.81	-191.658	-189.534	-193.018
PMe2H	-98.5	-107.436	-101.685	-101.339	-121.011	-99.1952	-97.6937	-119.888	-119.68	-123.054
PMe3	-61.58	-64.4292	-58.0739	-61.4407	-78.3854	-56.6307	-54.1471	-76.9002	-80.9749	-84.1851
PPh3	-5.28	-4.0532	0.3078	-3.1822	-12.0572	3.0317	6.1241	-16.2541	-19.8774	-20.9286
Methoxyphospholane	133.3	171.904	170.783	161.51	158.035	168.255	170.879	164.334	160.029	161.694
P(OMe)3	141.41	164.935	161.667	152.652	150.244	160.185	162.63	154.895	151.218	153.069
PCl3 (exp struc)	219.79	263.857	256.775	262.686	251.569	259.301	259.329	232.958	235.893	236.798
PH4+ in MeOH	-105.3	-145.096	-135.533	-131.373	-137.506	-129.847	-132.254	-141.3	-139.119	-161.338
PhO)4P+ PF6-	-28	-30.291	-28.9389	-20.8234	-18.6036	-30.3731	-31.2497	-28.2487	-28.1757	-28.9627
O=POCH2)3P=O PO	-18.1	-26.8844	-24.6964	-22.2494	-21.7567	-24.5333	-24.0943	-24.7124	-23.3987	-28.8704
P(OMe)4+ BF4-	1.9	-3.41536	-3.62926	-1.59993	0.0473164	-3.33396	-3.93149	-2.71922	-2.66209	-3.63268
(iPrO)2P(O)H	4.54	-2.59463	-1.47228	1.67397	4.0622	-0.102883	0.754968	-0.652738	-0.32517	-2.8738
O=POCH2)3P=O PC	6.4	-16.2388	-7.9304	-1.0303	-0.9543	-1.5132	-3.2074	-14.5472	-11.6458	-13.9064
MeO)2P(O)H	11.3	2.09918	3.86513	5.50383	7.55009	5.22751	6.18389	4.67389	5.14446	1.34972
Ph4P+Br-/Cl-	23.17	11.3388	16.8852	16.389	15.7022	26.2588	27.979	6.0981	5.1045	3.921
Me4P Br-/Cl-	25.1	7.9046	21.3819	22.6525	15.1263	29.7173	27.7428	8.9833	8.375	7.4806
(iPrO)2P(O)Me	28.61	27.216	28.2189	29.7617	32.5572	29.4025	29.8319	26.9011	26.5956	22.5609
Ph3PO	29.1	14.745	20.2271	21.7761	23.7226	25.5843	26.5817	14.2342	14.3634	7.3388
(MeO)2P(O)Me	32.3	30.6623	32.6427	33.3236	35.7413	34.1255	34.478	31.2849	30.7814	26.0803
Me3PO	38.79	17.6457	27.2928	28.6617	29.5751	33.1313	31.8091	20.2681	19.5247	6.8221
EtOP(O)Me2	50.3	41.8137	47.6745	48.0211	51.2679	51.0954	50.853	43.9082	43.0365	33.4158
H2P-P(H)-PH2 PH2	-162.6									-158.847
H2P-P(H)-PH2 PH	-179.1									-179.764
H2P-PH2	-205									-233.449
See Table S1 Notes 1-3 (Note 3 is for Latypov PBE0)
(1) Chemical shifts calc'd according to text eq 1: δ(31P)Calcd = σ(reference)Calcd – σ(31P)Calcd + δ(reference)Exp
Table S4. Linear regressions, P(Exp) vs P(calcd) chemical shifts, ppm
Functional for Optimization		B3LYP	B3LYP	M06-2X	M06-2X	B3LYP	B3LYP	B3LYP	PBE0	Latypov PBE0
Functional for NMR		B3LYP	B3LYP	B3LYP	M06-2X	B3LYP	B3LYP	PBE0	PBE0	Latypov PBE0
Basis set for NMR		6-311G(d,p)	6-311+G(2d,p)	6-311+G(2d,p)	6-311+G(2d,p)	IGLO-III	pcS-2	6-311+G(2d,p)	6-311+G(2d,p)	6-311G(2d,2p)
Chi squared		2462.9	1537.75	1221	703.477	1121.69	1404.34	1276.36	1114.84	2073.05
slope		0.854923	0.869464	0.878928	0.855386	0.873516	0.871521	0.87136	0.876551	0.858159
std dev		0.0211729	0.0169755	0.0152792	0.0112725	0.0145509	0.0162555	0.0154893	0.0145566	0.0194796
intercept		5.04548	2.22973	1.47694	4.91327	-0.0674799	-0.494732	8.77065	9.04565	12.3639
std dev		2.36776	1.86956	1.66584	1.26536	1.5968	1.78683	1.7084	1.59701	2.18518
Correlation coefficient		0.993922	0.99621	0.996992	0.998268	0.997237	0.996539	0.996855	0.997254	0.994887
Table S5. Scaled chemical shifts (eq 3 in text) from best fit parameters in Table S4 and unscaled calculations in Table S3; deviation from experimental
Functional for Optimization		B3LYP		B3LYP		M06-2X		M06-2X		B3LYP		B3LYP		B3LYP		PBE0		Latypov PBE0
Functional for NMR		B3LYP		B3LYP		B3LYP		M06-2X		B3LYP		B3LYP		PBE0		PBE0		Latypov PBE0
Compound/NMR basis set	Exp vs H3PO4	6-311G(d,p)	Deviation	6-311+G(2d,p)	Deviation	6-311+G(2d,p)	Deviation	6-311+G(2d,p)	Deviation	IGLO-III	Deviation	pcS-2	Deviation	6-311+G(2d,p)	Deviation	6-311+G(2d,p)	Deviation	6-311G(2d,2p)
PH3	-238	-226.894	11.1056	-235.129	2.8711	-236.955	1.0453	-238.669	0.668671	-237.29	0.71012	-236.206	1.7944	-236.301	1.69882	-236.429	1.5707	-231.686	6.31371
PMeH2	-163.5	-148.636	14.864	-151.901	11.5992	-152.945	10.555	-161.107	2.39328	-152.712	10.7885	-151.974	11.526	-158.233	5.26744	-157.09	6.40961	-153.276	10.2238
PMe2H	-98.5	-86.8044	11.6956	-86.1815	12.3185	-87.5927	10.9073	-98.5978	0.0978452	-86.7161	11.7839	-85.6368	12.8632	-95.695	2.80504	-95.8597	2.64029	-93.2362	5.26385
PMe3	-61.58	-50.0365	11.5435	-48.2634	13.3166	-52.525	9.05499	-62.1365	0.556504	-49.5353	12.0447	-47.6851	13.8949	-58.2371	3.34289	-61.933	0.352976	-59.8803	1.69971
PPh3	-5.28	1.5803	6.8603	2.49735	7.77735	-1.31999	3.96001	-5.40029	0.12029	2.58076	7.86076	4.84255	10.1225	-5.39253	0.112526	-8.3779	3.0979	-5.59615	0.31615
Methoxyphospholane	133.3	152.01	18.71	150.72	17.4197	143.433	10.1329	140.094	6.79437	146.906	13.6058	148.43	15.1296	151.965	18.6647	149.319	16.0191	151.123	17.8227
P(OMe)3	141.41	146.052	4.64227	142.794	1.38369	135.647	5.76319	133.43	7.98045	139.856	1.55359	141.24	0.169548	143.74	2.32954	141.596	0.185746	143.722	2.3116
PCl3 (exp struc)	219.79	230.623	10.8331	225.486	5.696	232.359	12.5688	220.102	0.312042	226.437	6.64653	225.516	5.7262	211.761	8.02881	215.818	3.97193	215.574	4.21618
PH4+ in MeOH	-105.3	-119.001	13.7008	-115.611	10.3113	-119.381	14.0813	-112.708	7.40778	-113.491	8.19056	-115.757	10.4565	-114.352	9.05209	-112.899	7.59898	-126.089	20.7894
PhO)4P+ PF6-	-28	-20.851	7.149	-22.9316	5.06839	-14.8743	13.1257	-11	17	-26.5989	1.40113	-27.7295	0.270498	-15.8441	12.1559	-15.6518	12.3482	-12.4907	15.5093
O=POCH2)3P=O PO	-18.1	-17.9386	0.161384	-19.2429	1.14291	-17.6456	0.454364	-13.6971	4.40289	-21.4977	3.39771	-21.4934	3.39342	-12.7627	5.33725	-11.4645	6.6355	-12.4115	5.68852
P(OMe)4+ BF4-	1.9	2.12561	0.225607	-0.925789	2.82579	1.51852	0.381475	4.95374	3.05374	-2.97974	4.87974	-3.92111	5.82111	6.40122	4.50122	6.7122	4.8122	9.2465	7.3465
(iPrO)2P(O)H	4.54	2.82726	1.71274	0.949629	3.59037	5.04732	0.507319	8.38802	3.84802	-0.15735	4.69735	0.163239	4.37676	8.20188	3.66188	8.76063	4.22063	9.89774	5.35774
O=POCH2)3P=O PC	6.4	-8.83745	15.2374	-4.66547	11.0655	0.638176	5.76182	4.09698	2.30302	-1.38928	7.78928	-3.29005	9.69005	-3.9052	10.3052	-1.16248	7.56248	0.430014	5.96999
MeO)2P(O)H	11.3	6.84012	4.45988	5.59032	5.70968	8.11292	3.18708	11.3715	0.0715117	4.49883	6.80117	4.89466	6.40534	12.8433	1.54329	13.555	2.25504	13.5222	2.22219
Ph4P+Br-/Cl-	23.17	14.7393	8.43072	16.9108	6.2592	15.278	7.89196	18.3447	4.82529	22.87	0.299998	23.8896	0.719554	14.0843	9.08571	13.52	9.64999	15.7288	7.44124
Me4P Br-/Cl-	25.1	11.8033	13.2967	20.8205	4.27948	14.7719	10.3281	17.8521	7.2479	25.8911	0.791057	23.6837	1.4163	16.5983	8.50166	16.3868	8.71323	18.7835	6.31654
(iPrO)2P(O)Me	28.61	28.3131	0.296933	26.765	1.84496	30.0924	1.48238	32.7623	4.15226	25.6161	2.99388	25.5044	3.10563	32.2112	3.60122	32.358	3.74801	31.7248	3.11479
Ph3PO	29.1	17.6513	11.4487	19.8165	9.28354	22.3274	6.77261	25.2052	3.89475	22.2808	6.81918	22.6718	6.42822	21.1738	7.92624	21.6359	7.46409	18.6618	10.4382
(MeO)2P(O)Me	32.3	31.2593	1.04066	30.6114	1.6886	32.8909	0.590926	35.4858	3.18584	29.7417	2.5583	29.5535	2.74646	36.031	3.73105	36.0271	3.72709	34.745	2.44498
Me3PO	38.79	20.1312	18.6588	25.9598	12.8302	27.4713	11.3187	30.2114	8.5786	28.8732	9.91676	27.2276	11.5624	26.4315	12.3585	26.16	12.63	18.2184	20.5716
EtOP(O)Me2	50.3	40.793	9.507	43.681	6.61903	46.5377	3.7623	48.7671	1.53291	44.5652	5.73485	43.8247	6.47527	47.0305	3.2695	46.7693	3.53069	41.04	9.26
MAD			8.89003		7.04095		6.5288		4.11036		5.96658		6.54973		6.24002		5.8702		7.75631
RMSD			10.5807		8.36048		7.9692		5.65475		7.14042		7.98958		7.61683		7.1186		9.7072
Table S6. Absolute chemical shifts for Table 2 and 3 phosphorus compounds
Functional for Optimization (1)			B3LYP	M06-2X	M06-2X	B3LYP	Latypov PBE0 (3)
Functional for NMR			B3LYP	B3LYP	M06-2X	B3LYP	Latypov PBE0 (3)
Compound/NMR Basis set (2)			6-311+G(2d,p)	6-311+G(2d,p)	6-311+G(2d,p)	IGLO-III	6-311G(2d,2p)
1a P(A) isomer A			230.844	234.591	233.761	240.649	269.912
1a P(B) isomer A			-42.5672	-35.893	-93.9873	-26.0863	-9.3202
1a P(A) isomer B			229.612	233.327	235.42	239.617	270.149
1a P(B) isomer B			-71.5659	-62.4552	-125.948	-55.7724	-40.7723
1a P(A) weighted avg (4)			230.752	234.483	233.903	240.572	269.932
1a P(B) weighted avg (4)			-44.7401	-38.172	-96.7294	-28.3107	-11.9541
2			410.021	413.323	423.605	410.688
3			342.931	346.569	354.479	346.99
4			257.177	264.162	268.963	263.214
5 P(A)			272.799	274.851	275.731	279.19
5 P(B)			263.925	264.37	266.542	270.339
6			281.145	289.474	306.136	287.077
7			232.805	244.935	247.044	243.398
8 P(A)			198.398	204.355	211.424	203.371
8 P(B)			411.773	428.152	434.466	421.001
9 P(A)			290.101	311.874	327.936	296.737
9 P(B)			180.236	192.311	189.031	187.352
9 P(C)			266.812	272.452	283.819	275.696
9 P(D)			210.606	215.192	214.684	216.642
10 P(A)			283.47	296.345	310.89	289.325
10 P(B)			162.919	183.435	183.582	172.629
11 isomer A			99.7594	111.76	118.746	112.019	134.62
11 isomer B			129.413	137.195	140.845	138.231	124.637
11 isomer C			91.3904	102.256	106.037	101.762
11 weighted avg			104.096	115.167	121.627	115.813	134.541
12 isomer A			133.298	134.945	139.079	142.738	150.06
12 isomer B			109.868	121.057	127.047	120.553	141.965
12 isomer C							157.416
12 weighted avg			121.285	132.046	136.568	131.363	151.563
13			130.69	146.938	153.32	139.844	174.937
14 isomer A			118.945	142.709	145.79	128.815	164.97
14 isomer B			113.557	143.526	144.159	124.103	159.245
14 weighted avg			118.009	143.016	145.178	127.996	164.22
15			135.818	145.834	153.687	145.831	165.578
16 isomer A			80.3456	90.2505	98.7984	91.632	107.159
16 isomer B			121.084	136.057	144.369	132.184	151.663
16 isomer C			121.428	126.58	135.101	132.277	152.355
16 weighted avg			121.086	133.488	141.857	132.093	151.862
17 isomer A (cis, chair)			136.385	145.115	153.245	145.729	168.598
17 isomer B (cis, twist 1)			136.277	146.469	153.358	147.028	170.336
17 isomer C (cis, twist 2)			144.636	151.875	158.668	154.746	176.265
17 weighted avg			136.691	146.017	153.423	146.804	169.748
18 isomer A (trans, chair)			115.781	115.781	123.957	126.633	148.421
18 isomer B trans, twist 1)			122.104	130.597	138.412	131.972	154.31
18 isomer C (trans, twist 2)			116.394	147.243	154.511	147.38	170.386
18 weighted avg			115.812	125.22	133.124	127.482	149.152
19			76.0963	86.0344	98.0139	86.776	113.543
20			114.548	123.014	125.571	127.86	131.591
21 (dicoordinate P)			-119.041	-114.513	-165.989	-102.464	-86.4483
21 (PPh3)			260.814	267.768	271.654	265.646	290.762
22			-72.4444	-51.405	-110.736	-56.6501	-15.6428
23			429.194	431.563	424.514	436.207	452.72
24			432.938	438.866	440.498	439.18	463.726
25			210.185	211.463	213.406	217.857	244.953
26			75.6259	82.3775	36.5498	88.2064	101.403
27 isomer A			271.965	275.642	278.716	281.261	292.041
27 isomer B			271.636	274.648	277.68	281.369	299.273
27 isomer C							289.69
27 weighted avg			271.962	275.638	278.711	281.262	292.115
28			268.286	272.014	275.376	277.689	288.871
29			191.607	179.098	177.19	198.476	212.229
anti-30			244.597	260.898	278.542	253.364	293.021
syn-30 isomer A			257.99	272.417	289.297	265.485	305.178
syn-30 isomer B			247.184	262.181	280.66	256.055	294.32
syn-30 weighted average			257.575	271.88	288.843	265.123	304.862
anti-30[O] isomer A			233.041	241.641	246.359	237.86	265.353
anti-30[O] isomer B							259.081
anti-30[O] weighted average							265.244
syn-30[O] isomer A			225.766	233.364	238.458	230.945	258.336
syn-30[O] isomer B			234.72	244.063	248.44	240.022	267.418
syn-30[O] weighted average			227.459	236.909	241.765	232.661	259.371
anti-31			298.452	322.811	332.079	302.007	346.668
syn-31			285.581	313.925	322.361	289.273	337.056
32 isomer A			348.136	477.383	504.859	357.596	440.565
32 isomer B			360.796	497.247	525.914	369.705	444.978
32 weighted avg			352.642	482.202	509.967	361.906	441.772
33			375.188	374.53	383.734	382.062	410.121
34			288.75	302.306	311.124	295.716	335.066
33[O]			253.23	255.116	256.968	258.146	286.793
34[O]			270.04	274.029	275.17	274.896	301.391
(1) Except as noted, all optimized with 6-31+G(d,p) basis set; both the optimization and NMR used the solvents listed in
Tables 2 and 3 with IEF-PCM solvation
(2) For NMR calculation
(3) Latypov optimization (see text): optimized with 6-31+G(d) basis set and no solvation; NMR: no solvation.
(4) See Table S7 for weighted average isomer ratio calculations; if only one value is reported in Table S6, only one isomer was found.
Table S7. Calculation of energy-weighted isomer ratios for Table S6 and S15 compounds
	E (au) (1)		Relative E		E (au) (1)	Relative E		E (au) (1)	Relative E		E (au) (1)	Relative E
Functional for Optimization	B3LYP		(kcal)	Ratio 298.15 K	M06-2X	(kcal)	Ratio 298.15 K	PBE0	(kcal)	Ratio 298.15 K	wB97X-D	(kcal)	Ratio 298.15 K
Basis set	6-31+G(d,p)	solvent			6-31+G(d,p)			6-31+G(d)			6-31+G(d,p)
1a isomer A	-1310.12	benzene	0	0.925068	-1309.72	0	0.914203	-1309.01	0	0.916257	-1309.9	0	0.908647
1a isomer B	-1310.12	benzene	1.48908	0.0749321	-1309.72	1.40186	0.0857971	-1309.01	1.41754	0.0837429	-1309.9	1.36107	0.0913531
11 isomer A	-1091.67	toluene	0	0.835973	-1091.3	0	0.841459	-1090.61	0	0.99199	-1091.41	0	0.58543
11 isomer B	-1091.67	toluene	1.01719	0.15017	-1091.3	1.05986	0.140652	-1090.61	2.85517	0.00801032	-1091.4	0.236571	0.392706
11 isomer C	-1091.67	toluene	2.42909	0.0138565	-1091.3	2.28162	0.017889				-1091.4	1.94779	0.0218641
12 isomer A	-1091.67	toluene	0.0301205	0.487293	-1091.31	0	0.791232	-1090.61	0	0.621923	-1091.41	0	0.695532
12 isomer B	-1091.67	toluene	0	0.512707	-1091.3	0.789407	0.208768	-1090.61	1.19541	0.0826983	-1091.41	0.489457	0.304468
12 isomer C								-1090.61	0.441139	0.295378
14 isomer A	-1792.9	chloroform	0	0.826213	-1792.39	0	0.624426	-1791.37	0	0.869056	-1792.53	0	0.412988
14 isomer B	-1792.9	chloroform	0.923694	0.173787	-1792.39	0.301205	0.375574	-1791.37	1.12136	0.130944	-1792.53	-0.208333	0.587012
15 isomer A (cis, chair)	-901.379	benzene	0	1	-901.076	0	1	-900.544	0	1	-901.193	0	0.999545
15 isomer B (cis, twist 1)	-901.371	benzene	4.98745	0.000220887	-901.07	4.37123	0.000624202	-900.537	4.35805	0.000639025	-901.185	4.70695	0.000354468
15 isomer C (cis, twist 2)	-901.371	benzene	4.93348	0.000241951	-901.069	4.39194	0.000602763	-900.537	4.49799	0.000504597	-901.184	5.45369	0.000100511
16 isomer A (trans, chair)	-901.369	benzene	3.14571	0.00309298	-901.065	4.74899	0.000240736	-900.533	4.44841	0.000377486	-901.181	5.03765	0.000151483
16 isomer B (trans, twist 1)	-901.374	benzene	0	0.625461	-901.072	0	0.728757	-900.54	0	0.688048	-901.189	0	0.746438
16 isomer C (trans, twist 2)	-901.374	benzene	0.308735	0.371446	-901.072	0.586094	0.271002	-900.54	0.469377	0.311575	-901.188	0.64006	0.253411
17 isomer A (cis, chair)	-920.766	benzene	0.109814	0.433834	-920.45	0.175703	0.41743	-919.896	0	0.488629	-920.579	0.0144327	0.482232
17 isomer B (cis, twist 1)	-920.766	benzene	0	0.522178	-920.45	0	0.561532	-919.896	0.0263554	0.467369	-920.579	0	0.494124
17 isomer C (cis, twist 2)	-920.764	benzene	1.46586	0.0439877	-920.447	1.94591	0.0210384	-919.894	1.42633	0.0440018	-920.576	1.80095	0.0236442
18 isomer A (trans, chair)	-920.769	benzene	0	0.958286	-920.45	0	0.691811	-919.9	0	0.965892	-920.58	0	0.837894
18 isomer B trans, twist 1)	-920.762	benzene	4.04932	0.00103114	-920.447	2.25276	0.0154419	-919.893	4.01292	0.00110517	-920.575	2.81626	0.0072252
18 isomer C (trans, twist 2)	-920.766	benzene	1.87186	0.0406826	-920.449	0.509538	0.292747	-919.897	2.0005	0.0330026	-920.578	1.00025	0.154881
27 isomer A	-1242.19	benzene	0	0.991469	-1241.77	0	0.99509	-1240.98	0	0.975406	-1241.88	0	0.990077
27 isomer B	-1242.19	benzene	2.81752	0.00853139	-1241.77	3.14696	0.00491043	-1240.97	2.5251	0.013749	-1241.88	2.72716	0.00992305
27 isomer C								-1240.97	2.66566	0.0108452
syn-30 isomer A	-695.556	toluene	0	0.961609	-695.323	0	0.947472	-694.942	0	0.970909	-695.437	0	0.957329
syn-30 isomer B	-695.553	toluene	1.90826	0.0383914	-695.32	1.71373	0.0525281	-694.939	2.07831	0.0290912	-695.434	1.843	0.042671
anti-30[O] isomer A	-770.818	toluene			-770.557			-770.125	0	0.982644
anti-30[O] isomer B								-770.121	2.39144	0.0173562
syn-30[O] isomer A	-770.816	toluene	0	0.810964	-770.555	0	0.668674	-770.123	0	0.885993	-770.678	0	0.724727
syn-30[O] isomer B	-770.815	toluene	0.862826	0.189036	-770.555	0.416039	0.331326	-770.121	1.21486	0.114007	-770.677	0.573544	0.275273
32 isomer A	-882.444	chloroform	0	0.644077	-882.156	0	0.757413	-881.622	0	0.726625	-882.232	0	0.780541
32 isomer B	-882.443	chloroform	0.351405	0.355923	-882.155	0.674573	0.242587	-881.621	0.579191	0.273375	-882.231	0.751756	0.219459
(1) See Notes in Table S2.
Table S8. Unscaled chemical shifts (1) for 1a-34[O] referenced to H3PO4 at 0.00 ppm
Functional for Optimization			B3LYP	M06-2X	M06-2X	B3LYP
Functional for NMR			B3LYP	B3LYP	M06-2X	B3LYP	Latypov PBE0 (3)
Compound/NMR basis set (2)	Exp vs H3PO4		6-311+G(2d,p)	6-311+G(2d,p)	6-311+G(2d,p)	IGLO-III	6-311G(2d,2p)
1a P(A) weighted avg (4)	39.6		51.2487	53.4289	59.8097	51.7798	28.898
1a P(B) weighted avg (4)	297.6		326.741	326.084	390.443	320.663	310.784
2	-110		-128.02	-125.411	-129.892	-118.336	-129.3
3	-54.5		-60.9304	-58.6571	-60.766	-54.6377	-68.6
4	24		24.8234	23.75	24.7501	29.1378	22.5
5 P(A)	18.3		9.2014	13.0614	17.9817	13.1618	5.8
5 P(B)	27.6		18.0754	23.5417	27.1716	22.0133	15
6	-10.2		0.8555	-1.5617	-12.4224	5.2746	-23.1
7	38.7		49.1955	42.9766	46.6696	48.9544	36.8
8 P(A)	76.7		83.6028	83.5567	82.2895	88.9812	63.9
8 P(B)	-157.7		-129.772	-140.24	-140.753	-128.649	-172.4
9 P(A)	-29.7		-8.0999	-23.9619	-34.2231	-4.3848	-41.9
9 P(B)	100.5		101.765	95.6006	104.682	105	84.1
9 P(C)	-10.6		15.1888	15.4596	9.894	16.6563	-7.1
9 P(D)	75.7		71.3949	72.7202	79.0292	75.7099	58.7
10 P(A)	-22.6		-1.4689	-8.4331	-17.1764	3.027	-36.5
10 P(B)	84.1		119.081	104.477	110.131	119.723	74.3
11 weighted avg	152.9		177.904	172.745	172.086	176.538	164.289
12 weighted avg	139.3		160.715	155.866	157.146	160.989	147.267
13	133		151.311	140.974	140.393	152.508	123.893
14 weighted avg	136.7		163.992	144.896	148.535	164.356	134.61
15	132.2		146.182	142.078	140.026	146.521	133.251
16 weighted avg	138.5		160.915	154.423	151.857	160.259	146.968
17 weighted avg	125.8		145.309	141.895	140.291	145.548	129.082
18 weighted avg	145.3		166.188	162.692	160.589	164.87	149.678
19	169		205.904	201.877	195.699	205.576	185.287
20	153		167.452	164.898	168.142	164.492	167.239
21 (dicoordinate P)	355.7		401.042	402.425	459.702	394.816	385.278
21 (PPh3)	26.2		21.1868	20.144	22.0591	26.7064	8.0674
22	302		354.445	339.317	404.449	349.002	314.473
23	-127.2		-147.194	-143.651	-130.8	-143.855	-153.89
24	-151		-150.937	-150.955	-146.785	-146.828	-164.896
25	63.5		71.8154	76.4487	80.3067	74.4946	53.8773
26	187.9		206.375	205.534	257.163	204.146	197.427
27 weighted avg	13.9		10.0388	12.2743	15.002	11.0899	6.715
28	16		13.7145	15.8975	18.3374	14.6627	9.9592
29	93		90.3934	108.814	116.524	93.8758	86.6008
anti-30	24.2		37.4039	27.0136	15.1711	38.9878	5.8089
syn-30 weighted average	11.3		24.4256	16.0322	4.8701	27.229	-6.0322
anti-30[O] weighted average	54.1		48.9595	46.2708	47.3538	54.4916	33.5857
syn-30[O] weighted average	61.8		54.5419	51.0032	51.9481	59.6907	39.4587
anti-31	-24.4		-16.4518	-34.8992	-38.3655	-9.6549	-47.8378
syn-31	-21.8		-3.5806	-26.0129	-28.6482	3.0787	-38.2265
32 weighted avg	-181		-70.6414	-194.29	-216.254	-69.5538	-142.942
33	-79		-93.1869	-86.6177	-90.0211	-89.7104	-111.291
34	-14		-6.7491	-14.3941	-17.411	-3.3642	-36.2362
33[O]	38		28.7704	32.7963	36.7448	34.2062	12.0373
34[O]	26		11.9609	13.8834	18.5429	17.4563	-2.5613
See Notes for Table 6; values in red taken from Latypov paper (see text).
Table S9. Scaled chemical shifts (eq 3 in text) from best fit parameters in Table S4 and unscaled calculations in Table S8; deviation from experimental
Functional for Optimization			B3LYP		M06-2X		M06-2X		B3LYP		Latypov PBE0 (1)
Functional for NMR			B3LYP		B3LYP		M06-2X		B3LYP		Latypov PBE0 (1)
Compound/NMR basis set	Exp vs H3PO4		6-311+G(2d,p)	Deviation	6-311+G(2d,p)	Deviation	6-311+G(2d,p)	Deviation	IGLO-III	Deviation	6-311G(2d,2p)	Deviation
1a P(A) weighted avg (5)	39.6		46.7886	7.18862	48.4371	8.83709	56.0737	16.4737	45.163	5.563	40.3083	0.708333
1a P(B) weighted avg (5)	297.6		286.319	11.2809	288.081	9.51879	338.892	41.2924	280.037	17.5635	302.96	5.35984
2	-110		-109.079	0.920596	-108.75	1.24987	-106.194	3.80556	-103.436	6.56422	-107.2	2.8
3	-54.5		-50.7471	3.75294	-50.0784	4.42157	-47.0651	7.43488	-47.7944	6.70561	-50.5	4
4	24		23.8128	0.187222	22.3515	1.64852	26.0842	2.08416	25.3849	1.38485	34.3	10.3
5 P(A)	18.3		10.23	8.06999	12.957	5.34303	20.2946	1.99456	11.4296	6.87044	18.8	0.5
5 P(B)	27.6		17.9456	9.65437	22.1684	5.4316	28.1555	0.555476	19.1615	8.43851	27.4	0.2
6	-10.2		2.97355	13.1736	0.104315	10.3043	-5.71268	4.48732	4.53997	14.74	-8.1	2.1
7	38.7		45.0034	6.30344	39.2503	0.550274	44.8338	6.13379	42.695	3.99497	47.7	9
8 P(A)	76.7		74.9193	1.78065	74.9173	1.78274	75.3026	1.39744	77.659	0.959022	72.9	3.8
8 P(B)	-157.7		-110.603	47.0975	-121.784	35.9163	-115.485	42.2152	-112.444	45.2557	-147.3	10.4
9 P(A)	-29.7		-4.81285	24.8872	-19.5838	10.1162	-24.3607	5.33931	-3.89767	25.8023	-25.7	4
9 P(B)	100.5		90.7108	9.78918	85.503	14.997	94.4567	6.0433	91.6514	8.84865	91.7	8.8
9 P(C)	-10.6		15.4358	26.0358	15.0648	25.6648	13.3765	23.9765	14.4821	25.0821	6.7	17.3
9 P(D)	75.7		64.305	11.395	65.3928	10.3072	72.5137	3.18626	66.0663	9.63367	68.1	7.6
10 P(A)	-22.6		0.952569	23.5526	-5.93515	16.6648	-9.77918	12.8208	2.57665	25.1767	-20.6	2
10 P(B)	84.1		105.767	21.6666	93.305	9.20496	99.1177	15.0177	104.513	20.4126	82.6	1.5
11 weighted avg	152.9		156.911	4.01102	153.307	0.407003	152.113	0.78686	154.142	1.24172	166.461	13.5613
12 weighted avg	139.3		141.966	2.66598	138.472	0.827808	139.334	0.0335017	140.559	1.25864	150.6	11.3002
13	133		133.789	0.788845	125.382	7.61751	125.003	7.99661	133.151	0.151135	128.821	4.17875
14 weighted avg	136.7		144.815	8.11469	128.83	7.87009	131.968	4.73154	143.5	6.79994	138.807	2.10698
15	132.2		129.33	2.86994	126.353	5.84708	124.69	7.51028	127.921	4.27887	137.541	5.34118
16 weighted avg	138.5		142.139	3.63926	137.204	1.29592	134.809	3.69072	139.921	1.4215	150.322	11.8221
17 weighted avg	125.8		128.571	2.7711	126.192	0.39225	124.916	0.884115	127.071	1.27085	133.656	7.85628
18 weighted avg	145.3		146.724	1.42447	144.471	0.828685	142.279	3.02132	143.949	1.35107	152.847	7.54672
19	169		181.256	12.2562	178.913	9.91272	172.312	3.31171	179.506	10.5064	186.026	17.026
20	153		147.823	5.17653	146.411	6.58942	148.74	4.26016	143.619	9.38091	169.209	16.2092
21 (dicoordinate P)	355.7		350.921	4.77895	355.179	0.520902	398.136	42.436	344.811	10.8893	372.371	16.6709
21 (PPh3)	26.2		20.6509	5.54912	19.1821	7.01794	23.7823	2.41768	23.261	2.93901	20.8991	5.30089
22	302		310.407	8.40698	299.712	2.28794	350.873	48.8732	304.791	2.79144	306.397	4.39684
23	-127.2		-125.75	1.45028	-124.782	2.41761	-106.972	20.2284	-125.727	1.47288	-130.007	2.8075
24	-151		-129.005	21.9951	-131.201	19.7987	-120.644	30.3556	-128.324	22.6757	-140.262	10.7378
25	63.5		64.6706	1.17063	68.6698	5.16984	73.6065	10.1065	65.0047	1.50475	63.5832	0.0831703
26	187.9		181.665	6.23482	182.127	5.77312	224.887	36.9872	178.257	9.64303	197.338	9.43803
27 weighted avg	13.9		10.9581	2.9419	12.2652	1.63484	17.7458	3.84577	9.61973	4.28027	19.639	5.73899
28	16		14.154	1.84601	15.4497	0.550305	20.5988	4.59883	12.7406	3.25938	22.6618	6.66182
29	93		80.8235	12.1765	97.1169	4.11687	104.586	11.586	81.9345	11.0655	94.0738	1.07378
anti-30	24.2		34.7511	10.5511	25.2199	1.01995	17.8904	6.30958	33.989	9.78899	18.7947	5.40528
syn-30 weighted average	11.3		23.4669	12.1669	15.5681	4.26809	9.07909	2.22091	23.7175	12.4175	7.7616	3.5384
anti-30[O] weighted average	54.1		44.7982	9.30175	42.1456	11.9544	45.419	8.68095	47.5318	6.5682	44.6762	9.42383
syn-30[O] weighted average	61.8		49.6519	12.1481	46.3051	15.4949	49.3489	12.4511	52.0733	9.7267	50.1484	11.6516
anti-31	-24.4		-12.0745	12.3255	-29.1969	4.79695	-27.904	3.50404	-8.50119	15.8988	-31.1914	6.7914
syn-31	-21.8		-0.883478	20.9165	-21.3865	0.413471	-19.592	2.208	2.62181	24.4218	-22.2359	0.435926
32 weighted avg	-181		-59.1904	121.81	-169.29	11.7103	-180.067	0.932797	-60.8238	120.176	-119.806	61.194
33	-79		-78.7929	0.20707	-74.6538	4.34622	-72.0895	6.91048	-78.4309	0.56905	-90.3148	11.3148
34	-14		-3.63837	10.3616	-11.1744	2.82556	-9.97986	4.02014	-3.00616	10.9938	-20.3814	6.38143
33[O]	38		27.2446	10.7554	30.3025	7.69748	36.3443	1.65574	29.8122	8.18782	24.5981	13.4019
34[O]	26		12.6293	13.3707	13.6794	12.3206	20.7746	5.22539	15.1809	10.8191	10.9957	15.0043
MAD				11.8941		7.07674		10.3342		11.8905		8.22436
RMSD				21.7777		9.93427		16.2571		21.6509		12.285
See Notes for previous tables; values in red taken from Latypov paper (see text).
(1) In order to reproduce the reported scaled values from the Latypov group (where P(calcd) vs P(exp) was plotted),
P(scaled) = (P(calcd)-b)/m where m = 1.073232 ± 0.020120, b = -14.362193 ± 2.652406, and P(calcd) = 298.8299-P(absolute)
Table S10. Absolute chemical shifts for tri and tetracoordinate phosphorus compounds for screened functionals
Functional for Optimization		M06-2X	M06-2X	M06-2X	M06-2X	wB97X-D
Functional for NMR (1)		M06-L	TPSSTPSS (2)	PBE0	wB97X-D	wB97X-D
Compound/Basis set	Exp vs H3PO4	6-311+G(2d,p)	6-311+G(2d,p)	6-311+G(2d,p)	6-311+G(2d,p)	6-311+G(2d,p)
PH3	-238	563.606	556.689	580.747	572.491	569.18
PMeH2	-163.5	487.872	473.563	491.134	485.027	482.005
PMe2H	-98.5	426.037	407.998	420.836	416.149	414.187
PMe3	-61.58	388.312	370.985	381.709	376.603	375.143
PPh3	-5.28	339.034	314.03	321.273	317.113	317.154
Methoxyphospholane	133.3	179.496	147.937	145.942	140.065	135.829
P(OMe)3 isomer A		185.529	153.629	151.054	145.504	143.292
P(OMe)3 isomer B		217.417	186.597	182.906	177.148	174.816
P(OMe)3 isomer C		160.168	127.544	124.738	118.993	116.25
P(OMe)3 weighted avg (4)	141.41	189.667	157.91	155.168	149.583	146.145
PCl3 (exp struc ) (5)	219.79	99.327	56.3322	62.696	59.5935	59.5935
H3PO4 in water sym isomer	0	333.182	305.303	300.992	296.929	295.4
PH4+ BF4- in MeOH	-105.3	428.473	435.227	438.416	432.432	431.992
P(OPh)4+ PF6-	-28	353.671	330.88	322.366	315.854	318.25
O=P(OCH2)3P=O PO	-18.1	353.826	328.53	323.35	318.316	318.884
P(OMe)4+ BF4- isomer A		334.075	308.886	302.041	297.291	297.762
P(OMe)4+ BF4- isomer B		325.403	299.864	293.557	289.104	290.671
P(OMe)4+ BF4- weighted avg	1.9	334.069	308.88	302.036	297.285	297.744
(iPrO)2P(O)H isomer A		331.227	307.411	299.137	295.144	294.678
(iPrO)2P(O)H isomer B		329.402	306.776	298.819	294.993	294.503
(iPrO)2P(O)H isomer C		329.55	306.922	298.924	295.096	294.413
(iPrO)2P(O)H isomer D		331.151	307.336	299.053	295.062	294.714
(iPrO)2P(O)H weighted avg	4.54	329.588	306.888	298.89	295.052	294.498
O=P(OCH2)3P=O PC	6.4	338.281	310.623	308.909	304.508	307.593
(MeO)2P(O)H isomer A		325.782	303.04	295.251	291.596	291.492
(MeO)2P(O)H isomer B		326.663	302.214	294.374	290.852	290.388
(MeO)2P(O)H isomer C		324.88	300.696	293.16	289.716	289.31
(MeO)2P(O)H weighted avg	11.3	325.723	302.645	294.888	291.273	290.926
PPh4+ Br-	23.17	320.706	296.72	295.187	289.416	289.21
PMe4+ Br-	25.1	309.979	289.51	291.774	287.271	286.632
(iPrO)2P(O)Me isomer A		311.685	283.326	277.22	272.459	273.405
(iPrO)2P(O)Me isomer B		306.61	278.381	272.534	267.783	267.447
(iPrO)2P(O)Me isomer C		311.739	283.362	277.276	272.507	273.523
(iPrO)2P(O)Me weighted avg	28.61	306.881	278.645	272.785	268.032	268.488
Ph3PO	29.1	314.916	286.718	285.328	281.137	279.813
(MeO)2P(O)Me isomer A		302.545	274.226	268.753	264.181	264.188
(MeO)2P(O)Me isomer B		302.252	273.41	268.248	263.806	263.924
(MeO)2P(O)Me isomer C		308.782	280.14	274.466	269.899	269.895
(MeO)2P(O)Me weighted avg	32.3	302.983	274.609	269.139	264.576	264.43
Me3PO	38.79	309.701	281.228	279.726	275.609	275.396
EtOP(O)Me2 isomer A		291.396	261.274	256.817	252.215	252.079
EtOP(O)Me2 isomer B		294.066	264.055	259.425	254.765	254.554
EtOP(O)Me2 weighted avg	50.3	291.422	261.302	256.842	252.241	252.114
See Notes for Table S1.
(1) GIAO exceot as noted
(2) CSGT used for NMR
Table S11. Calculation of energy-weighted isomer ratios for Table S10 wB97X-D optimization
	E (au) (1)	Relative E
Functional for Optimization	wB97X-D	(kcal)	Ratio 298.15 K
Basis set	6-31+G(d,p)
P(OMe)3 Isomer
A	-686.586	0	0.855051
B	-686.584	1.18537	0.115641
C	-686.583	1.99862	0.0293084
P(OMe)4+ BF4- isomer
A	-1226.03	0	0.997466
B	-1226.03	3.54041	0.0025337
(iPrO)2P(O)H isomer
A	-804.474	1.31212	0.0579233
B	-804.476	0	0.530454
C	-804.476	0.266692	0.33819
D	-804.474	1.17156	0.0734322
(MeO)2P(O)H isomer
A	-647.336	0	0.698766
B	-647.334	1.25376	0.0842005
C	-647.335	0.69277	0.217033
(iPrO)2P(O)Me isomer
A	-843.772	1.52673	0.0628965
B	-843.774	0	0.827428
C	-843.772	1.19729	0.109676
(MeO)2P(O)Me isomer
A	-686.634	0	0.887388
B	-686.632	1.5305	0.067027
C	-686.632	1.75891	0.0455849
EtOP(O)Me2 isomer
A	-650.712	0	0.985598
B	-650.708	2.50376	0.0144021
(1) Sum of electronic and thermal Free Energies from Gaussian vibrational calculation; see Table S1 notes for solvation.
Gas constant from IUPAC:		1.9872
E conversion:		627.51
Table S12. Chemical shifts (1) for tri and tetracoordinate phosphorus compounds referenced to H3PO4 at 0.00 ppm for screened functionals
Functional for Optimization		M06-2X	M06-2X	M06-2X	M06-2X	wB97X-D
Functional for NMR (1)		M06-L	TPSSTPSS (2)	PBE0	wB97X-D	wB97X-D
Compound/NMR basis set	Exp vs H3PO4	6-311+G(2d,p)	6-311+G(2d,p)	6-311+G(2d,p)	6-311+G(2d,p)	6-311+G(2d,p)
PH3	-238	-230.424	-251.386	-279.755	-275.562	-273.779
PMeH2	-163.5	-154.69	-168.26	-190.142	-188.098	-186.605
PMe2H	-98.5	-92.8551	-102.696	-119.844	-119.219	-118.787
PMe3	-61.58	-55.13	-65.6827	-80.7167	-79.6734	-79.7423
PPh3	-5.28	-5.8521	-8.7274	-20.2813	-20.1837	-21.7539
Methoxyphospholane	133.3	153.686	157.365	155.05	156.865	159.571
P(OMe)3 weighted avg (4)	141.41	143.515	147.392	145.824	147.346	149.255
PCl3 (exp struc ) (5)	219.79	233.855	248.97	238.296	237.336	235.807
PH4+ BF4- in MeOH	-105.3	-95.2907	-129.925	-137.425	-135.502	-136.592
P(OPh)4+ PF6-	-28	-20.4891	-25.5775	-21.374	-18.9243	-22.8491
O=P(OCH2)3P=O PO	-18.1	-20.6435	-23.227	-22.3581	-21.3867	-23.4833
P(OMe)4+ BF4- weighted avg	1.9	-0.88722	-3.5774	-1.04414	-0.356027	-2.34373
(iPrO)2P(O)H weighted avg	4.54	3.59376	-1.58532	2.10187	1.87682	0.902265
O=P(OCH2)3P=O PC	6.4	-5.0987	-5.3209	-7.9166	-7.5785	-12.193
(MeO)2P(O)H weighted avg	11.3	7.4594	2.65777	6.10415	5.65661	4.47467
PPh4+ Br-	23.17	12.4759	8.5823	5.8047	7.5129	6.1901
PMe4+ Br-	25.1	23.2026	15.7931	9.2183	9.6587	8.7687
(iPrO)2P(O)Me weighted avg	28.61	26.3011	26.6576	28.2072	28.8971	26.9122
Ph3PO	29.1	18.2656	18.5844	15.6635	15.7926	15.5871
(MeO)2P(O)Me weighted avg	32.3	30.1993	30.694	31.8525	32.3538	30.97
Me3PO	38.79	23.481	24.0747	21.2654	21.3205	20.0042
EtOP(O)Me2 weighted avg	50.3	41.7601	44.0007	44.1494	44.6887	43.286
See Notes for previous tables.
(1) GIAO exceot as noted
(2) CSGT used for NMR
Table S13. Linear regressions, P(Exp) vs P(calcd) chemical shifts, ppm, for screened functionals
Functional for Optimization		M06-2X	M06-2X	M06-2X	M06-2X	wB97X-D
Functional for NMR (1)		M06-L	TPSSTPSS (2)	PBE0	wB97X-D	wB97X-D
Basis set for NMR		6-311+G(2d,p)	6-311+G(2d,p)	6-311+G(2d,p)	6-311+G(2d,p)	6-311+G(2d,p)
Chi squared		1693.17	1473.44	1101.3	1188.1	1249.53
slope		0.997613	0.9213	0.880229	0.885284	0.886764
std dev		0.020446	0.0176047	0.0145281	0.0151797	0.0155955
intercept		-0.390792	3.82393	8.35596	7.58632	8.37154
std dev		1.96195	1.83061	1.5864	1.64681	1.68981
Correlation coefficient		0.995826	0.996369	0.997287	0.997073	0.996921
(1) GIAO exceot as noted
(2) CSGT used for NMR
Table S14. Scaled chemical shifts (eq 3 in text) from best fit parameters in Table S13 and unscaled calculations in Table S12, deviation from experimental
Functional for Optimization		M06-2X		M06-2X		M06-2X		M06-2X		wB97X-D
Functional for NMR (1)		M06-L		TPSSTPSS (2)		PBE0		wB97X-D		wB97X-D
Compound/NMR basis set	Exp vs H3PO4	6-311+G(2d,p)	Deviation	6-311+G(2d,p)	Deviation	6-311+G(2d,p)	Deviation	6-311+G(2d,p)	Deviation	6-311+G(2d,p)	Deviation
PH3	-238	-230.265	7.73493	-227.778	10.2219	-237.892	0.107762	-236.364	1.63569	-234.406	3.59391
PMeH2	-163.5	-154.712	8.78845	-151.194	12.3059	-159.013	4.48737	-158.934	4.56599	-157.103	6.3973
PMe2H	-98.5	-93.0242	5.47575	-90.7896	7.71038	-97.1342	1.3658	-97.9565	0.543471	-96.9641	1.53586
PMe3	-61.58	-55.3892	6.1908	-56.6895	4.89046	-62.6932	1.11322	-62.9473	1.36727	-62.3411	0.761059
PPh3	-5.28	-6.22892	0.948923	-4.21663	1.06337	-9.49623	4.21623	-10.282	5.00199	-10.919	5.63903
Methoxyphospholane	133.3	152.929	19.6286	148.805	15.5046	144.836	11.5357	146.456	13.156	149.874	16.5736
P(OMe)3	141.41	142.782	1.37159	139.616	1.79373	136.715	4.69546	138.029	3.38059	140.726	0.684251
PCl3 (exp struc)	219.79	232.906	13.1161	233.2	13.4104	218.111	1.67908	217.696	2.09409	217.477	2.31339
PH4+ in MeOH	-105.3	-95.454	9.84597	-115.876	10.5755	-112.609	7.30916	-112.372	7.07161	-112.753	7.45306
PhO)4P+ PF6-	-28	-20.831	7.16902	-19.7406	8.25938	-10.4581	17.5419	-9.16706	18.8329	-11.8902	16.1098
O=POCH2)3P=O PO	-18.1	-20.985	2.88502	-17.5751	0.524892	-11.3243	6.77571	-11.347	6.75302	-12.4526	5.6474
P(OMe)4+ BF4-	1.9	-1.27589	3.17589	0.528069	1.37193	7.43688	5.53688	7.27114	5.37114	6.2932	4.3932
(iPrO)2P(O)H	4.54	3.19439	1.34561	2.36337	2.17663	10.2061	5.66609	9.24784	4.70784	9.17164	4.63164
O=POCH2)3P=O PC	6.4	-5.47732	11.8773	-1.07822	7.47822	1.38754	5.01246	0.877196	5.5228	-2.44077	8.84077
MeO)2P(O)H	11.3	7.0508	4.2492	6.27253	5.02747	13.729	2.42901	12.594	1.29403	12.3395	1.03952
Ph4P+Br-/Cl-	23.17	12.0553	11.1147	11.7308	11.4392	13.4654	9.70457	14.2374	8.93263	13.8607	9.3093
Me4P Br-/Cl-	25.1	22.7564	2.34358	18.3741	6.72589	16.4702	8.62982	16.137	8.96299	16.1473	8.95269
(iPrO)2P(O)Me	28.61	25.8476	2.76244	28.3835	0.226459	33.1847	4.57473	33.1685	4.5585	32.2363	3.62627
Ph3PO	29.1	17.8312	11.2688	20.9457	8.15427	22.1434	6.95657	21.5673	7.53274	22.1936	6.90638
(MeO)2P(O)Me	32.3	29.7364	2.5636	32.1023	0.197654	36.3934	4.09344	36.2286	3.92861	35.8346	3.53461
Me3PO	38.79	23.0342	15.7558	26.0039	12.7861	27.0744	11.7156	26.461	12.329	26.1105	12.6795
EtOP(O)Me2	50.3	41.2697	9.03034	44.3617	5.93827	47.2176	3.08241	47.1485	3.15146	46.756	3.54403
MAD			7.21102		6.71739		5.82859		5.94065		6.09848
RMSD			8.7728		8.1838		7.07524		7.34878		7.53635
(1) GIAO exceot as noted
(2) CSGT used for NMR
Table S15. Absolute chemical shifts for Table 2 and 3 phosphorus compounds for screened functionals
Functional for Optimization		M06-2X	M06-2X	M06-2X	M06-2X	wB97X-D
Functional for NMR (1)		M06-L	TPSSTPSS (2)	PBE0	wB97X-D	wB97X-D
Compound/NMR Basis set		6-311+G(2d,p)	6-311+G(2d,p)	6-311+G(2d,p)	6-311+G(2d,p)	6-311+G(2d,p)
1a P(A) isomer A		285.206	259.052	262.433	261.779	261.961
1a P(B) isomer A		43.9025	12.0193	-11.1916	-22.5126	-21.7125
1a P(A) isomer B		282.966	256.709	262.442	262.471	263.312
1a P(B) isomer B		16.3629	-15.6027	-39.0322	-49.3511	-49.7637
1a P(A) weighted avg (5)		285.014	258.851	262.433	261.839	262.077
1a P(B) weighted avg (5)		41.5397	9.64941	-13.5802	-24.8153	-24.1192
2		449.858	428.641	433.334	436.965	437.238
3		387.203	368.978	366.526	366.423	368.176
4		313.684	284.989	281.344	276.521	275.466
5 P(A)		319.491	298.897	292.846	286.258	288.639
5 P(B)		310.018	289.234	283.644	277.12	280.124
6		339.901	313.424	321.712	317.369	317.166
7		304.241	273.365	274.477	272.258	278.711
8 P(A)		261.497	235.384	236.361	229.785	232.265
8 P(B)		481.184	458.407	462.165	454.572	456.606
9 P(A)		368.556	336.416	344.08	341.851	340.377
9 P(B)		252.414	219.307	215.449	210.899	212.977
9 P(C)		334.815	307.834	308.621	299.039	304.09
9 P(D)		270.382	239.716	237.454	234.485	235.341
10 P(A)		346.448	316.688	327.077	326.2	330.055
10 P(B)		246.432	214.052	217.598	215.803	217.301
11 isomer A		173.591	140.165	138.073	132.138	133.116
11 isomer B		196.621	164.299	161.47	155.029	151.349
11 isomer C		162.245	129.308	127.697	121.038	120.92
11 weighted avg		176.627	143.365	141.178	135.159	140.009
12 isomer A		193.222	161.426	159.541	153.496	153.352
12 isomer B		180.25	147.786	146.279	141.097	140.855
12 weighted avg		190.513	158.579	156.772	150.907	149.547
13		204.706	176.025	172.709	163.458	160.986
14 isomer A		200.304	172.351	167.999	158.6	152.395
14 isomer B		201.136	173.009	167.835	157.301	153.032
14 weighted avg		200.616	172.598	167.938	158.112	152.769
15		199.501	170.892	168.517	161.824	161.409
16 isomer A		147.141	115.479	113.386	107.253	106.449
16 isomer B		190.99	161.805	158.709	152.386	152.426
16 isomer C		181.628	152.611	149.532	143.198	146.615
16 weighted avg		188.442	159.302	156.211	149.885	150.947
17 isomer A (cis, chair)		197.658	170.704	169.588	163.24	163.693
17 isomer B (cis, twist 1)		199.672	173.492	170.601	164.461	164.824
17 isomer C (cis, twist 2)		203.712	178.954	175.943	169.445	169.938
17 weighted avg		198.916	172.443	170.29	164.056	164.399
18 isomer A (trans, chair)		170.886	143.334	140.958	134.875	144.211
18 isomer B trans, twist 1)		183.935	156.25	154.894	149.198	150.62
18 isomer C (trans, twist 2)		199.968	173.756	171.293	165.404	165.568
18 weighted avg		179.601	152.44	150.053	144.034	147.565
19		142.212	109.205	112.201	106.457	108.948
20		177.826	149.259	146.865	138.716	149.735
21 (dicoordinate P)		-22.1576	-44.1016	-90.5691	-117.043	-116.715
21 (PPh3)		315.596	292.768	293.348	285.353	285.299
22		46.5668	25.7194	-24.8088	-63.7537	-59.8143
23		476.061	457.285	458.357	452.547	456.972
24		485.496	463.839	467.783	460.306	463.994
25		264.948	241.53	238.085	231.015	233.57
26		153.825	130.364	106.266	94.1408	94.0861
27 isomer A		322.026	295.869	289.76	284.966	284.668
27 isomer B		321.572	295.726	288.667	283.962	285.912
27 weighted avg		322.024	295.868	289.755	284.961	284.681
28		318.156	292.063	286.21	281.551	281.733
29		236.205	205.875	197.613	189.807	188.663
anti-30		317.552	288.163	294.817	289.011	286.413
syn-30 isomer A		326.558	298.265	305.448	299.176	297.957
syn-30 isomer B		318.188	290.776	296.443	290.131	287.839
syn-30 weighted average		326.119	297.871	304.975	298.701	297.526
anti-30[O]		296.907	264.759	262.471	258.002	257.472
syn-30[O] isomer A		288.243	255.37	254.047	249.811	249.217
syn-30[O] isomer B		297.619	267.086	264.427	259.698	258.914
syn-30[O] weighted average		291.35	259.252	257.486	253.087	251.887
anti-31		369.12	341.565	343.704	342.273	346.196
syn-31		360.92	332.879	334.809	332.953	336.056
32 isomer A		505.722	485.966	502.618	504.937	498.14
32 isomer B		519.096	502.613	520.495	523.044	514.488
32 weighted avg		508.966	490.005	506.954	509.329	501.728
33		414.731	399.649	403.182	390.289	391.194
34		351.198	329.967	332.614	323.183	319.941
33[O]		306.469	278.329	275.918	269.659	270.129
34[O]		322.409	297.298	293.698	287.448	287.283
See Notes for previous tables.
(1) GIAO exceot as noted
(2) CSGT used for NMR
Table S16. Unscaled chemical shifts for 1a-34[O] referenced to H3PO4 at 0.00 ppm for screened functionals
Functional for Optimization		M06-2X	M06-2X	M06-2X	M06-2X	wB97X-D
Functional for NMR (1)		M06-L	TPSSTPSS (2)	PBE0	wB97X-D	wB97X-D
Compound/NMR basis set	Exp vs H3PO4	6-311+G(2d,p)	6-311+G(2d,p)	6-311+G(2d,p)	6-311+G(2d,p)	6-311+G(2d,p)
1a P(A) weighted avg (5)	39.6	48.1679	46.4513	38.5584	35.0905	33.3236
1a P(B) weighted avg (5)	297.6	291.642	295.653	314.572	321.745	319.52
2	-110	-116.676	-123.339	-132.342	-140.036	-141.838
3	-54.5	-54.021	-63.6751	-65.5336	-69.4942	-72.7758
4	24	19.498	20.3137	19.6481	20.4085	19.9348
5 P(A)	18.3	13.6909	6.40565	8.14585	10.6714	6.76165
5 P(B)	27.6	23.1643	16.0684	17.3474	19.809	15.276
6	-10.2	-6.7191	-8.1214	-20.7196	-20.4393	-21.7654
7	38.7	28.9412	31.9375	26.5145	24.671	16.6898
8 P(A)	76.7	71.6854	69.9183	64.6311	67.1448	63.1353
8 P(B)	-157.7	-148.002	-153.104	-161.173	-157.642	-161.206
9 P(A)	-29.7	-35.374	-31.113	-43.088	-44.9218	-44.9769
9 P(B)	100.5	80.7685	85.9959	85.5426	86.0299	82.4236
9 P(C)	-10.6	-1.6325	-2.531	-7.6287	-2.1095	-8.6898
9 P(D)	75.7	62.8	65.587	63.538	62.4443	60.0594
10 P(A)	-22.6	-13.2661	-11.3849	-26.085	-29.2705	-34.6549
10 P(B)	84.1	86.7499	91.2504	83.3942	81.1266	78.0993
11 weighted avg	152.9	156.555	161.937	159.814	161.77	155.391
12 weighted avg	139.3	142.669	146.724	144.219	146.022	145.853
13	133	128.476	129.278	128.283	133.471	134.415
14 weighted avg	136.7	132.566	132.704	133.054	138.817	142.632
15	132.2	133.681	134.41	132.475	135.105	133.992
16 weighted avg	138.5	144.74	146.001	144.781	147.044	144.454
17 weighted avg	125.8	134.266	132.859	130.701	132.874	131.001
18 weighted avg	145.3	153.581	152.863	150.939	152.896	147.835
19	169	190.97	196.097	188.791	190.472	186.452
20	153	155.356	156.044	154.127	158.213	145.665
21 (dicoordinate P)	355.7	355.34	349.404	391.561	413.973	412.115
21 (PPh3)	26.2	17.5861	12.5344	7.64405	11.5764	10.1016
22	302	286.615	279.583	325.801	360.683	355.215
23	-127.2	-142.879	-151.982	-157.365	-155.618	-161.572
24	-151	-152.314	-158.537	-166.791	-163.377	-168.593
25	63.5	68.2341	63.7728	62.9065	65.9143	61.8301
26	187.9	179.357	174.939	194.725	202.788	201.314
27 weighted avg	13.9	11.1583	9.4344	11.237	11.9684	10.7199
28	16	15.026	13.2393	14.7816	15.3783	13.6671
29	93	96.9767	99.428	103.378	107.123	106.737
anti-30	24.2	15.6305	17.1392	6.1752	7.918	8.9878
syn-30 weighted average	11.3	7.06356	7.43127	-3.98329	-1.77159	-2.12514
anti-30[O]	54.1	36.2754	40.544	38.5207	38.9274	37.9288
syn-30[O] weighted average	61.8	41.8325	46.051	43.5056	43.8427	43.5138
anti-31	-24.4	-35.9381	-36.2626	-42.7122	-45.3436	-50.7957
syn-31	-21.8	-27.7376	-27.5768	-33.8168	-36.0237	-40.6557
32 weighted avg	-181	-175.784	-184.702	-205.963	-212.4	-206.327
33	-79	-81.5487	-94.3463	-102.19	-93.3596	-95.794
34	-14	-18.0155	-24.6646	-31.622	-26.2538	-24.5403
33[O]	38	26.7129	26.9736	25.0737	27.2701	25.2718
34[O]	26	10.7736	8.0044	7.2936	9.4812	8.117
See Notes for previous tables.
(1) GIAO exceot as noted
(2) CSGT used for NMR
Table S17. Scaled chemical shifts (eq 3 in text) from best fit parameters in Table S13 and unscaled calculations in Table S16; deviation from experimental
Functional for Optimization		M06-2X		M06-2X		M06-2X		M06-2X		wB97X-D
Functional for NMR (1)		M06-L		TPSSTPSS (2)		PBE0		wB97X-D		wB97X-D
Compound/NMR basis set (2)	Exp vs H3PO4	6-311+G(2d,p)	Deviation	6-311+G(2d,p)	Deviation	6-311+G(2d,p)	Deviation	6-311+G(2d,p)	Deviation	6-311+G(2d,p)	Deviation
1a P(A) weighted avg	39.6	47.6621	8.06211	46.6195	7.01949	42.2962	2.69621	38.6514	0.948646	37.9217	1.67827
1a P(B) weighted avg	297.6	290.555	7.04452	276.209	21.3908	285.251	12.3485	292.422	5.17836	291.71	5.88997
2	-110	-116.788	6.78849	-109.808	0.191891	-108.135	1.86461	-116.385	6.38487	-117.405	7.40485
3	-54.5	-54.2828	0.217156	-54.8399	0.339943	-49.3286	5.17139	-53.9358	0.564218	-56.1634	1.66342
4	24	19.0607	4.93933	22.5389	1.46106	25.6508	1.65079	25.6536	1.65364	26.049	2.049
5 P(A)	18.3	13.2675	5.03252	9.72545	8.57455	15.5262	2.77382	17.0335	1.2665	14.3675	3.93247
5 P(B)	27.6	22.7182	4.88179	18.6277	8.97226	23.6256	3.97435	25.1229	2.47709	21.9177	5.68225
6	-10.2	-7.09385	3.10615	-3.65832	6.54168	-9.88203	0.317969	-10.5083	0.308264	-10.9292	0.729231
7	38.7	28.4814	10.2186	33.248	5.45201	31.6948	7.00516	29.4272	9.27284	23.1715	15.5285
8 P(A)	76.7	71.1235	5.57651	68.2397	8.46034	65.2461	11.4539	67.0285	9.67146	64.3577	12.3423
8 P(B)	-157.7	-148.04	9.66019	-137.231	20.4692	-133.513	24.1866	-131.972	25.728	-134.58	23.1199
9 P(A)	-29.7	-35.6804	5.98035	-24.8405	4.85952	-29.5713	0.128655	-32.1822	2.48223	-31.5124	1.81235
9 P(B)	100.5	80.1849	20.3151	83.0519	17.4481	83.653	16.847	83.7472	16.7528	81.4618	19.0382
9 P(C)	-10.6	-2.0194	8.5806	1.49212	12.0921	1.64096	12.241	5.71881	16.3188	0.66574	11.2657
9 P(D)	75.7	62.2593	13.4407	64.2492	11.4508	64.284	11.416	62.8673	12.8327	61.6301	14.0699
10 P(A)	-22.6	-13.6252	8.97477	-6.66498	15.935	-14.6048	7.99519	-18.3264	4.27362	-22.3592	0.240824
10 P(B)	84.1	86.152	2.05204	87.8929	3.79292	81.762	2.33804	79.4064	4.6936	77.6272	6.47281
11 weighted avg	152.9	155.791	2.89063	153.017	0.116748	149.029	3.8712	150.799	2.10104	146.167	6.73327
12 weighted avg	139.3	141.937	2.63729	139.001	0.299462	135.302	3.99794	136.857	2.44291	137.709	1.59117
13	133	127.779	5.22136	122.928	10.0723	121.274	11.7255	125.746	7.25412	127.566	5.43425
14 weighted avg	136.7	131.859	4.84118	126.084	10.6157	125.474	11.2257	130.479	6.2213	134.852	1.84797
15	132.2	132.971	0.770712	127.656	4.54368	124.964	7.2357	127.193	5.00712	127.19	5.00953
16 weighted avg	138.5	144.004	5.50364	138.334	0.165738	135.796	2.70357	137.762	0.738129	136.468	2.03206
17 weighted avg	125.8	133.555	7.75472	126.227	0.427361	123.403	2.39683	125.217	0.582879	124.539	1.26149
18 weighted avg	145.3	152.824	7.5237	144.657	0.643476	141.216	4.08354	142.942	2.35766	139.466	5.83355
19	169	190.124	21.1237	184.489	15.4886	174.535	5.53536	176.208	7.20849	173.711	4.71082
20	153	154.595	1.59457	147.587	5.4131	144.023	8.97707	147.65	5.34989	137.542	15.4575
21 (dicoordinate P)	355.7	354.101	1.59929	325.73	29.97	353.019	2.68069	374.07	18.3696	373.821	18.1206
21 (PPh3)	26.2	17.1533	9.04672	15.3719	10.8281	15.0845	11.1155	17.8347	8.36532	17.3293	8.87068
22	302	285.54	16.4596	261.404	40.5961	295.135	6.86481	326.893	24.8932	323.363	21.3632
23	-127.2	-142.928	15.7283	-136.197	8.99727	-130.161	2.96127	-130.18	2.97972	-134.904	7.70425
24	-151	-152.341	1.34132	-142.236	8.76416	-138.458	12.5416	-137.048	13.9515	-141.131	9.86898
25	63.5	67.6804	4.18043	62.5778	0.922192	63.7281	0.228088	65.9392	2.4392	63.2002	0.299751
26	187.9	178.538	9.36162	164.995	22.9048	179.759	8.14101	187.112	0.788265	186.89	1.01018
27 weighted avg	13.9	10.7409	3.1591	12.5158	1.38416	18.2471	4.34707	18.1818	4.28178	17.8775	3.97753
28	16	14.5993	1.40066	16.0213	0.0212941	21.3672	5.36715	21.2005	5.20048	20.491	4.49103
29	93	96.3544	3.35442	95.4269	2.42694	99.3527	6.35272	102.42	9.42016	103.022	10.0221
anti-30	24.2	15.2024	8.9976	19.6143	4.58573	13.7916	10.4084	14.596	9.604	16.3416	7.8584
syn-30 weighted average	11.3	6.65591	4.64409	10.6704	0.629646	4.84975	6.45025	6.01796	5.28204	6.48705	4.81295
anti-30[O]	54.1	35.798	18.302	41.1771	12.9229	42.263	11.837	42.0481	12.0519	42.0054	12.0946
syn-30[O] weighted average	61.8	41.3419	20.4581	46.2507	15.5493	46.6509	15.1491	46.3995	15.4005	46.958	14.842
anti-31	-24.4	-36.2431	11.8431	-29.5848	5.18481	-29.2406	4.84056	-32.5556	8.15564	-36.6723	12.2723
syn-31	-21.8	-28.0622	6.26218	-21.5826	0.217421	-21.4106	0.389434	-24.3049	2.50488	-27.6805	5.88047
32 weighted avg	-181	-175.755	5.24475	-166.342	14.658	-172.938	8.06176	-180.448	0.552188	-174.592	6.40792
33	-79	-81.7448	2.74484	-83.0973	4.09732	-81.5944	2.59438	-75.0634	3.93656	-76.5751	2.42487
34	-14	-18.3633	4.36329	-18.8996	4.89957	-19.4786	5.47864	-15.6557	1.65575	-13.3899	0.610087
33[O]	38	26.2583	11.7417	28.6747	9.3253	30.4266	7.57344	31.7281	6.2719	30.7817	7.21834
34[O]	26	10.3571	15.6429	11.1984	14.8016	14.776	11.224	15.9799	10.0201	15.5694	10.4306
MAD			7.51268		8.66509		6.89101		6.79575		7.36276
RMSD			9.27321		12.0572		8.45238		9.12604		9.37368
See Notes for previous tables.
(1) GIAO exceot as noted
(2) CSGT used for NMR
